# Supplementary material for: Adding stimuli-responsive extensions to antifouling hairy particles
Source: Royal Society of Chemistry journal article supplement (doi:10.1039/c0py00054j), 2010-01-01
Supplement: c0py00054j.pdf [file c0py00054j.pdf]

## Supporting Information

### Adding stimuli-responsive extensions to antifouling hairy particles

Alexandra Muñoz-Bonilla,<sup>a,b</sup> Alex M. van Herk<sup>a</sup> and Johan P.A. Heuts\*<sup>a</sup>

<sup>a</sup>Laboratory of Polymer Chemistry, Eindhoven University of Technology, P.O. Box 513, 5600 MB Eindhoven, The Netherlands

<sup>b</sup>Instituto de Ciencia y Tecnología de Polímeros (CSIC), C/ Juan de la Cierva 3, 28006-Madrid, Spain.

#### Experimental section

**Materials.** 2-(Dimethylamino) ethyl methacrylate (DMAEMA) was purified by passing over a basic alumina column. Sodium methacrylate (NaMA) (99%, Aldrich), copper (I) bromide (Cu(I)Br) (98%, Aldrich), 2,2'-bipyridine (bpy) (99%+, Aldrich) were used as received. The dialysis tubing (with cut-off molecular weight of 3500) was purchased from Serva. Bovine albumin-fluorescein isothiocyanate conjugate was supplied by Sigma-Aldrich.

**Surface initiated ATRP of DMAEMA from hairy particles.** The functionalized polystyrene hairy particles were synthesised and characterised as previously reported.<sup>1</sup> A suspension of functionalised hairy particles in water (2 g, 16.6 wt % solids) previously dialysed was de-oxygenated for 20 min with nitrogen in a Schlenk tube fitted with a magnetic stirring bar. The tube was charged with bpy (0.0198 g, 127  $\mu\text{mol}$ ) and Cu(I)Br (0.0091 g, 64  $\mu\text{mol}$ ) and the mixture was purged with nitrogen under stirring. The monomer, DMAEMA, (1 g, 6.36 mmol) was added subsequently to the reaction which was heated at 45 °C. Samples were taken periodically from the mixture at suitable time periods and conversion measured by gravimetry. After 7 h the polymerisation was stopped and purified by dialysis to remove the residual monomer and the catalyst.

A control experiment (using a non-dialysed seed latex) was carried out under the same experimental conditions but in the absence of the Cu/bpy system.

**Surface initiated ATRP of NaMA from hairy particles.** A suspension of the seed hairy particles in water (2 g, 16.6 wt % solids) previously dialysed was placed into a Schlenk tube. Sodium methacrylate (1 g, 9.26 mmol) was added to the suspension and the pH of the medium was adjusted to pH = 9. The mixture was deoxygenated by purging with nitrogen for 20 min at ambient temperature. Subsequently, bpy (0.0289 g, 185  $\mu$ mol) and Cu(I)Br (0.0133 g, 93  $\mu$ mol) were added to the reaction. The polymerisation was allowed to proceed for 5 h at room temperature under nitrogen atmosphere. The resulting latex was cooled in an ice bath and purified by dialysis. The monomer conversion of the final latex was determined by gravimetry, removing the residual monomer by dialysis.

**Measurements.** FTIR spectra were recorded on a Bio-Rad Infrared Excalibur 3000 FTIR spectrometer. The particle size distributions were determined by dynamic light scattering (DLS) using a Malvern Zetasizer Nano ZS instrument at 25 °C. Malvern Dispersion Software was used for data acquisition and analysis, applying the general purpose algorithm for calculating size distribution. The analysis of the mean electrophoretic mobility was also performed using a Malvern Zetasizer Nano ZS instrument at 25°C. The zeta potential was calculated from the mean electrophoretic mobility through Smoluchowski's equation. Transmission electron microscopy (TEM) measurements were performed on a FEI Tecnai 20, type Sphera TEM instrument (with a LaB<sub>6</sub> filament, operating voltage=200 kV). The particle size distributions were obtained from statistical treatment of representative TEM images for each sample using the software ImageJ (<http://rsb.info.nih.gov/ij/>). Average particle diameters and polydispersities ( $PDI_{TEM}$ ) were determined from these particle size distributions.  $PDI_{TEM}$  were calculated according to  $PDI = D_w/D_n$  where  $D_w$  is the weight average diameter,  $D_w = \sum n_i D_i^4 / \sum n_i D_i^3$  and  $D_n$  is the number average diameter  $D_n = \sum n_i D_i / n_i$  ( $n_i$  is the number of particles with diameter  $D_i$ ). The films studied by contact angle and fluorescence spectroscopy methods were deposited as thin films on glass or aluminum surfaces. Films used for contact angle measurements were annealed at 130

°C for 24 h. Contact angles were measured using deionized water on a Dataphysics OCA 30 instrument at room temperature. Dynamic advancing and receding contact angles were recorded while water was added to and withdrawn from the drop, respectively, by a syringe pump. Non-specific adsorption of proteins (i.e, bovine albumin serum) on functionalized polystyrene films was studied by incubating the samples in buffered saline solution (PBS, pH = 7.4) of  $1 \text{ mg mL}^{-1}$  of BSA-FITC. After 24 h, non-absorbed proteins were removed by washing the films with excess PBS and distilled water. The relative fluorescence intensity, which was taken as a measure for the amount of adsorbed protein, was determined by steady-state fluorescence spectroscopy using an Edinburgh Instruments FS920. Emission spectra were recorded from 500 to 800 nm using excitation light of 490 nm.

## Results.

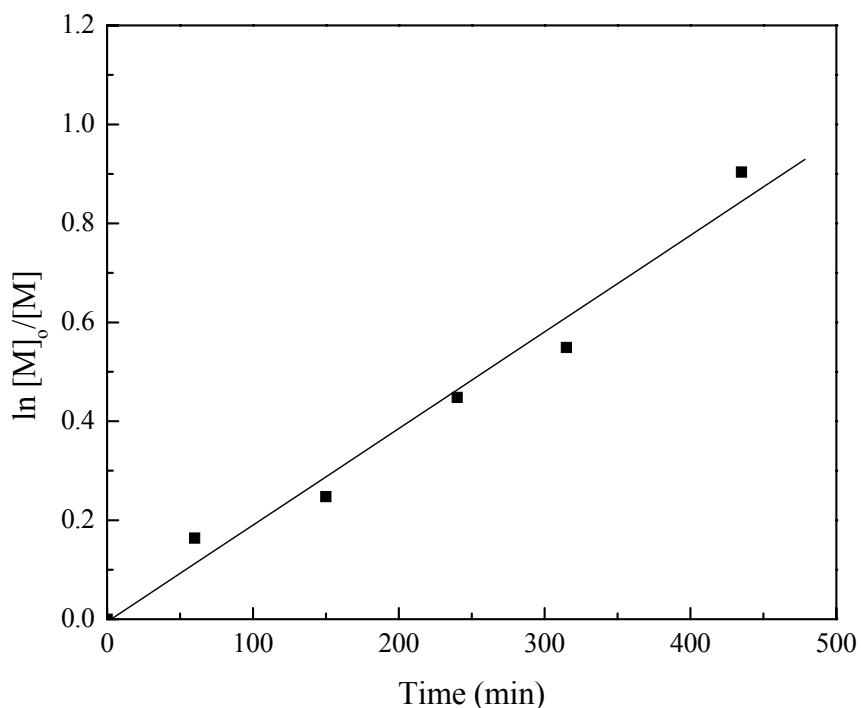

**Figure S1.** First-order kinetic plot for the surface initiated ATRP of DMAEMA from the hairy particles at 45 °C.

**Characterization of the particles after adding extensions of PDMAEMA and PNaMA by FTIR.**

The ATRP of DMAEMA from polystyrene hairy particles was investigated by FTIR as shown in Figure S2. The characteristic absorption band at  $1112\text{ cm}^{-1}$  (C-O-C stretching vibration) is consistent with the presence of P(PEGMA) in the polystyrene latex. After the chain extension of DMAEMA from the polystyrene latex stabilised by  $\text{PS}_{40}\text{-}b\text{-P(PEGMA1100)}_{70}$ , an absorption band at  $2770\text{ cm}^{-1}$  corresponding to C-H stretching of the tertiary amine moiety of PDMAEMA was appears. Also a very clear absorption band at  $1730\text{ cm}^{-1}$  corresponding to ester C=O stretching of PDMAEMA is observed.

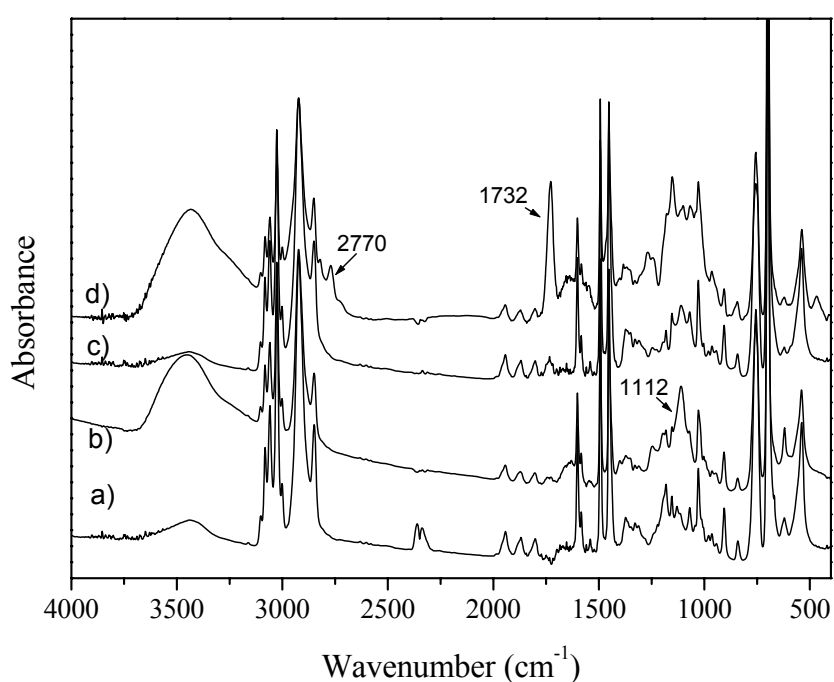

**Figure S2.** FTIR spectra of a) polystyrene latex, b) polystyrene latex stabilized by  $\text{PS}_{40}\text{-}b\text{-P(PEGMA1100)}_{70}$ , c) polystyrene latex after the polymerization in the absence of  $\text{CuBr/bpy}$  (control experiment), d) polystyrene latex after extension with PDMAEMA.

The successful chain extension of NaMA was also investigated by FTIR as shown in Figure S3. The characteristic absorption band at  $1112\text{ cm}^{-1}$  (C-O-C stretching vibration) is consistent with the presence of P(PEGMA) in the polystyrene latex. After the ATRP of NaMA from the polystyrene latex stabilized by  $\text{PS}_{40}\text{-}b\text{-P(PEGMA1100)}_{70}$ , the antisymmetric OC-O valence band caused by the sodium salt of poly(methacrylic acid) is seen at  $1548\text{ cm}^{-1}$ . After the conversion of sodium methacrylate salt into carboxylic acid groups a new absorption appears at  $1700\text{ cm}^{-1}$ , typical of the carboxylic acid moieties and characteristic for hydrogen-bonded dimers of carboxylic acid groups.

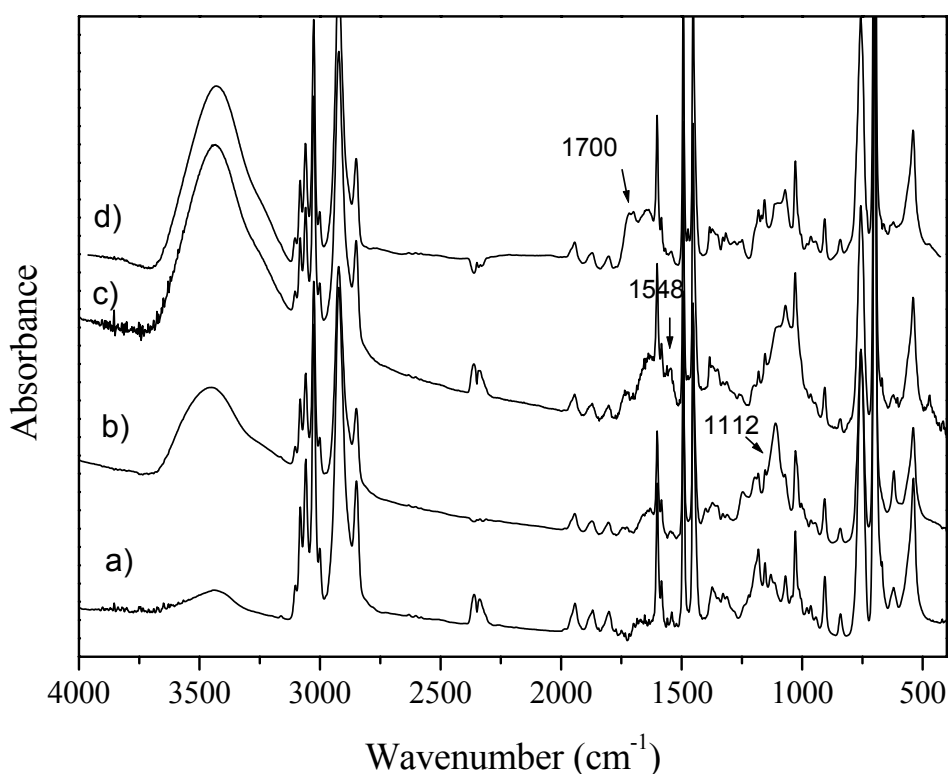

**Figure S3.** FTIR spectra of a) polystyrene latex, b) polystyrene latex with  $\text{PS}_{40}\text{-}b\text{-P(PEGMA1100)}_{70}$  as stabiliser, c) polystyrene latex after the extension with PNaMA, and d) polystyrene latex after the extension with PNaMA and after neutralization.

**Table S1.** Static ( $\theta_S$ ), advancing ( $\theta_A$ ) and receding ( $\theta_R$ ) contact angles of water obtained by needle-syringe on film samples after annealing at 130 °C for 24 h.

| Film                                                                                      | $\theta_S$ | $\theta_A$ | $\theta_R$ | Ref.       |
|-------------------------------------------------------------------------------------------|------------|------------|------------|------------|
| PS latex with SDBS                                                                        | 92.5       | 109 ± 0.9  | 77.6 ± 1   | 1          |
| PS latex with PS <sub>40</sub> - <i>b</i> -P(PEGMA1100) <sub>70</sub> (3.2 wt%)           | 77.7       | 88.2 ± 0.4 | 58.1 ± 1.2 | 1          |
| PS latex with PS <sub>40</sub> - <i>b</i> -P(PEGMA1100) <sub>70</sub> - <i>b</i> -PDMAEMA | 58.7       | 68.5 ± 0.6 | 34.2 ± 2.4 | This study |
| PS latex with PS <sub>40</sub> - <i>b</i> -P(PEGMA1100) <sub>70</sub> - <i>b</i> -PNaMA   | 73.8       | 78.5 ± 0.4 | 35.5 ± 1.4 | This study |

## References

1. A. Muñoz-Bonilla, A. M. van Herk, J. P. A. Heuts, *Macromolecules*, 2010, **43**, 2721.
